# 1 **Synchronised brood transport by ants occurs without** 2 **communication**

3

4 Danielle P. Mersch<sup>1,\*</sup>, Jean-Pierre Eckmann<sup>2</sup>, Alessandro Crespi<sup>3</sup>, Laurent Keller<sup>1</sup>

5

6 <sup>1</sup> Department of Ecology and Evolution, University of Lausanne, Switzerland

7 <sup>2</sup> Département de Physique Théorique et Section des Mathématiques, Université de

8 Genève, Switzerland

9 <sup>3</sup> Biorobotics Laboratory, Ecole polytechnique fédérale de Lausanne, Switzerland

10

11 \* *corresponding author*: [danielle.mersch@gmail.com](mailto:danielle.mersch@gmail.com)

12

13

## 14 **Abstract**

15 **Collective behaviours in societies such as those formed by ants are thought to be**  
16 **the result of distributed mechanisms of information processing and direct**  
17 **decision-making by well-informed individuals, but their relative importance**  
18 **remains unclear. Here we tracked all ants and brood movements to investigate**  
19 **the decision strategy underlying brood transport in nests of the ant *Camponotus***  
20 ***fellah*. Changes in environmental conditions induced workers to quickly**  
21 **transport the brood to a preferred location. Only a minority of the workers,**  
22 **mainly nurses, participated in this task. Using a large number of statistical tests**  
23 **we could further show that these transporters omitted to recruit help, and relied**  
24 **only on private information rather than information obtained from other**  
25 **workers. This reveals that synchronised group behaviour, often suggestive of**  
26 **coordinated actions among workers, can also occur in the complete absence of**  
27 **communication.**

28

## 29 **Introduction**

30 The success of group actions frequently relies on communication between  
31 individuals. Communication is manifest in animal groups as different as jellyfish

32 that use bioluminescence to locate each other and team up<sup>1</sup>, prairie dogs that call  
33 to warn their family of predators<sup>2</sup> and honeybees that use waggle dance to signal  
34 a food source to nest mates<sup>3,4</sup>. In all these cases communication serves to  
35 enhance the efficiency and safety of the group. However, communication is  
36 complex. It requires that the sender recognizes the appropriate circumstances  
37 and produces a correct signal, and that the receivers are able to understand the  
38 signal and react appropriately. These inherent difficulties constrain when and  
39 under what conditions groups of animals might communicate.

40

41 In ant societies communication is widespread and individuals make use of an array of  
42 olfactory, vibrational and tactile communication strategies. Therefore, communication  
43 is often assumed to be underlying all group behaviours<sup>5,6,7,8,9,10</sup>. Ants optimize foraging  
44 by creating pheromone trails<sup>11,12</sup>, and by recruiting help to retrieve food through  
45 tandem runs, a method whereby a knowledgeable ant induces a naive ant through  
46 tactile and chemical signals to follow it<sup>13</sup>. In emergencies, ants release highly volatile  
47 alarm pheromones<sup>11</sup>. If a nest is destroyed knowledgeable ants first lead tandem runs  
48 to new nest sites before switching to brood transport<sup>14</sup>. In all these instances  
49 communication is manifest and beneficial to the society. Pheromone trails and tandem  
50 recruitment reduce the risks of random food searches and ensure that a sufficient  
51 number of workers locate and retrieve food before it disappears, thereby enhancing  
52 the colony's chances of survival and reproduction. Similarly in emergencies the  
53 survival of the colony is at stake. Alarm pheromones ensure that workers are alerted  
54 and leave the nest<sup>15</sup> for fight or flight. Tandem runs ensure that a sufficient number of  
55 workers know the location of a safe alternative nest before evacuating brood<sup>9</sup>.  
56 However, there is a range of other group behaviours such as nest construction or  
57 brood relocation where the advantages of communication are less apparent. For  
58 example, many ant species regularly move brood within a nest and between nests to  
59 raise offspring under optimal temperature and humidity<sup>16,17,18,19,20</sup>. Such controlled  
60 responses to environmental variables are a central part of colony organisation in social  
61 insects because they have direct impacts on colony growth, metabolic expenditure,  
62 survival and reproduction<sup>19,20,21</sup>.

63

64 In this study we conduct a detailed analysis of brood transport in the ant *Camponotus*  
65 *fellah* to investigate to what extent workers communicate to displace the brood after  
66 changes in environmental conditions. We took advantage of the fortuitous observation  
67 that workers moved the brood in response to environmental changes in three colonies  
68 (colony size=197, 192, and 206 workers, brood items=150, 60 and 35) to investigate  
69 whether workers communicate about observed changes in local conditions. In *C.*  
70 *fellah*, as in most other ants, workers quickly respond to environmental changes to  
71 move the brood to the nest regions with the best conditions<sup>22, 23, 24, 25</sup>.

72

## 73 Results

### 74 Colonies transport brood in synchrony

75 In each of the three colonies, and each of the nights, workers responded to the  
76 environmental change, initiating brood transport  $22.4 \pm 6.2$  minutes (mean $\pm$ SEM) after  
77 the light was turned off in the tunnel (Fig. 1). There were neither consistent  
78 differences across colonies, nor a change in the response delay over the three days  
79 (ANCOVA, colony:  $F=0.9$ ,  $p=0.37$ ; day:  $F=0.77$ ,  $p=0.41$ ; interaction colony\*day:  
80  $F=0.41$ ,  $p=0.69$ ). On average workers took  $160.0 \pm 48.0$  minutes to move all the brood  
81 from the nest to the tunnel once transport was initiated. Workers also performed this  
82 task in synchrony with multiple workers transporting in parallel during  $66.1 \pm 28.0\%$  of  
83 the time. The average time taken by a worker to transport one brood item was  
84  $36.7 \pm 4.0$  seconds (see Supplementary Video 1). Workers that transported more brood  
85 items were faster to transport brood than those transporting fewer brood items  
86 (Spearman rank correlation:  $\rho=-0.51$ ,  $p<0.0001$ ; Supplementary Fig. 2). There were  
87 again neither significant differences across colonies, nor over days, in the time  
88 required to transport all the brood (ANCOVA on log-transformed duration: colony:  
89  $F=1.5$ ,  $p=0.31$ ; day:  $F=1.3$ ,  $p=0.24$ ; colony\*day:  $F=1.2$ ,  $p=0.40$ ).

90

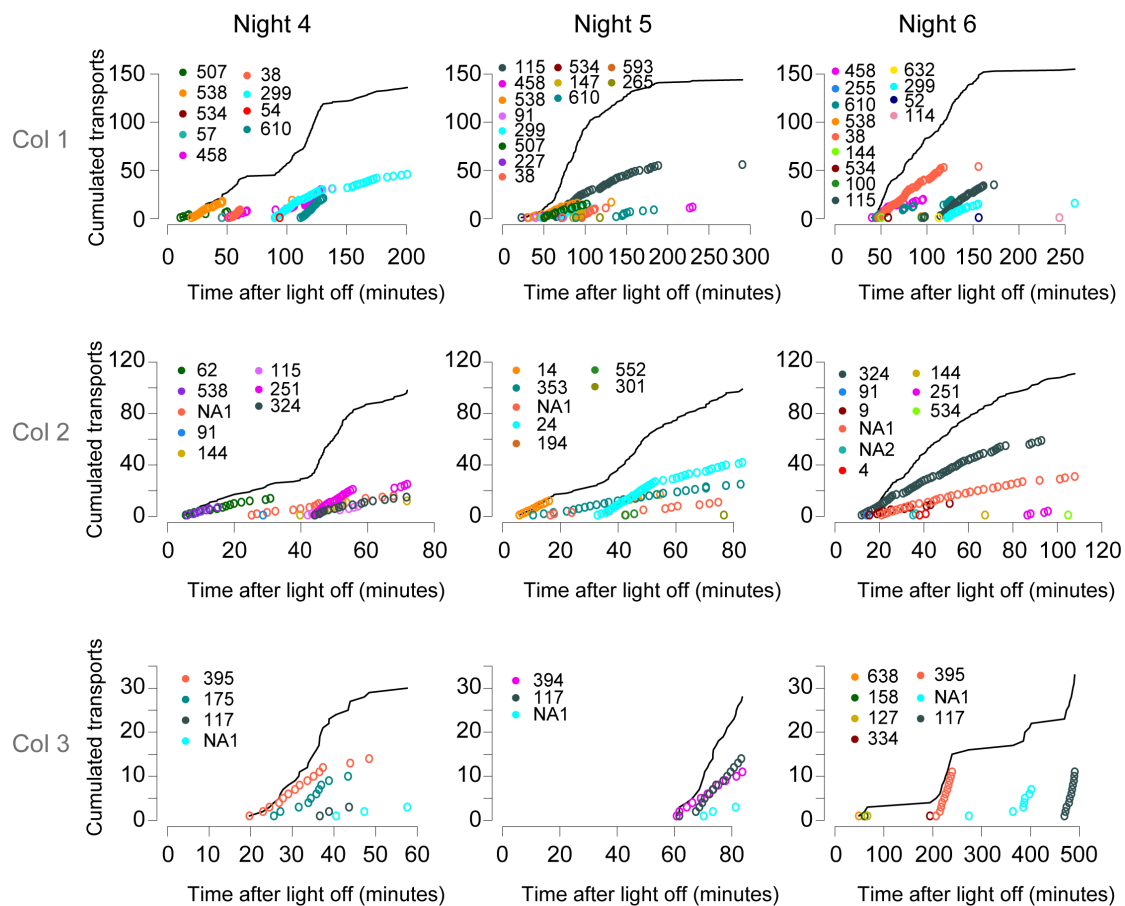

91

92 **Fig 1. Brood transport dynamics on three consecutive days in three colonies.** The  
 93 black line indicates the cumulated number of brood transports to the tunnel of all workers.  
 94 Each coloured circle represents a single brood transport event by one worker, and data are  
 95 shown as cumulated transports. Different colours represent different workers.

96

### 97 *A small minority of a colony's workforce transports brood*

98 The number of workers involved in brood transport was consistently low, with only  
 99  $8.1 \pm 1.1$  workers ( $4.1\% \pm 0.6\%$  of the workforce) participating in brood transport on  
 100 any given day in any given colony (Fig. 2). Colonies did not differ in the distribution  
 101 of the workload among workers, and there was no significant change over days in the  
 102 way the workload was distributed among transporters (ANCOVA: colony:  $F=0.40$   
 103  $p=0.67$ ; day:  $F=0.15$   $p=0.86$ ; colony\*day:  $F=0.14$ ,  $p=0.97$ ). However, there was  
 104 variation among transporters in their relative contribution with the notable effect that  
 105 more than 80% of all brood transports were performed by less than 1.8% of all  
 106 workers. In addition, there was also a high worker turnover with  $66.9 \pm 5.2\%$  of the  
 107 transporters working on a single night, while only  $18.8 \pm 11.9\%$  of the transporters

108 worked on all three nights. Importantly, however, the persistent transporters were  
 109 responsible for  $44.3 \pm 25.3\%$  of all transports while those that worked a single night  
 110 contributed together to  $24.8 \pm 18.7\%$  of the transports.  
 111

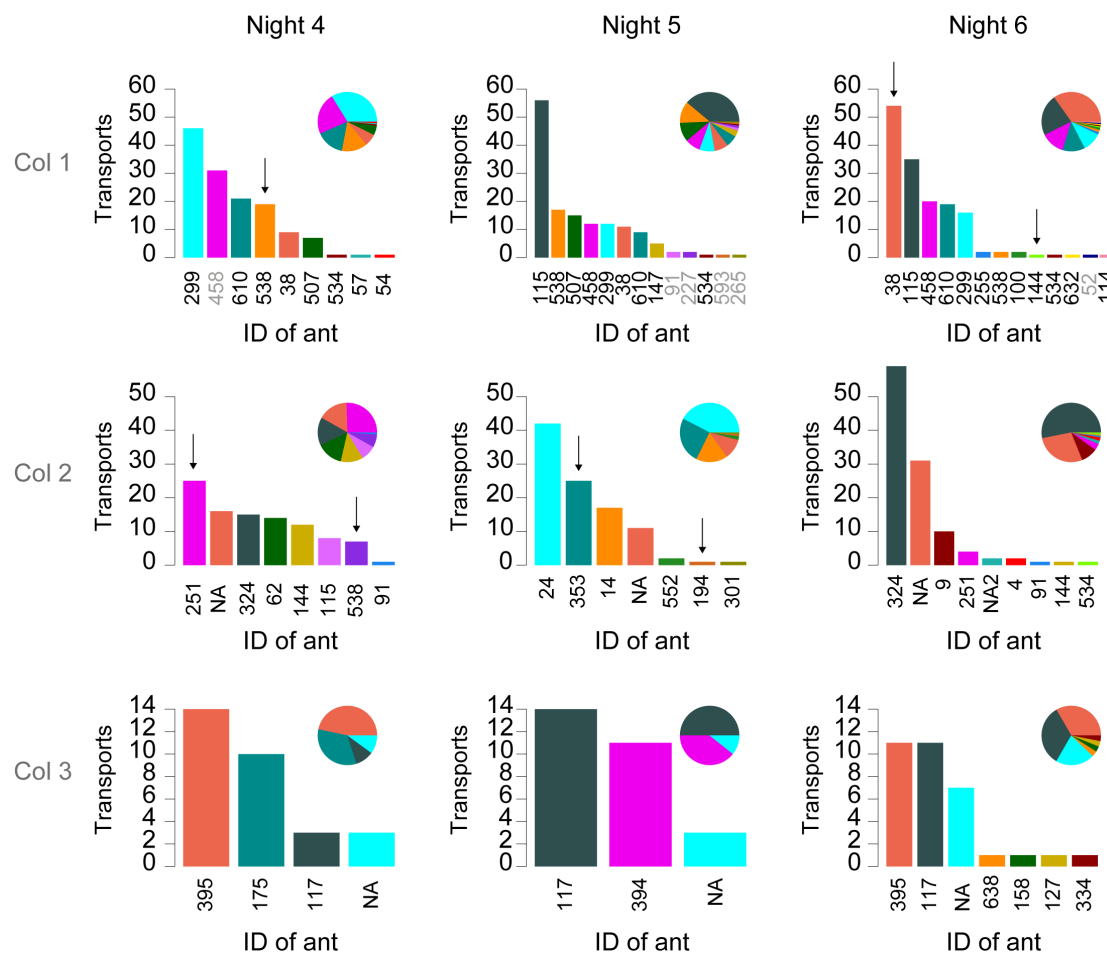

Color ranking based on total transports :  most fewest

112  
 113 **Fig 2. The workload is distributed unevenly among the transporters.** Absolute  
 114 numbers are given in the histogram, and proportions are indicated in the pie chart. Arrows  
 115 indicate workers that transport without being privately informed (i.e. they had not visited  
 116 the tunnel before starting to transport). Transporters with ID labels in black are nurses,  
 117 while those with labels in grey belong to the cleaner or forager groups.

118

### 119 *Transporters are nurses*

120 To determine whether brood transport was preferentially conducted by a specific  
 121 group of workers, we used the Infomap algorithm<sup>26</sup> to determine the daily interaction  
 122 networks of workers and assign each of them to a specific social group<sup>27</sup>. Colonies

123 had on average  $55.9\% \pm 11.3\%$  nurses,  $16.5\% \pm 4.9\%$  cleaners and  $25.1\% \pm 7.4\%$   
124 foragers (Fig. 3). Nurses were 3.8 times more likely to transport than cleaners, and 7.3  
125 more likely to transport than foragers (ANOVA,  $F=51.38$ ,  $p<0.0002$ ). There was also  
126 an effect of age, with transporters being on average younger (83.5 days) than non-  
127 transporters (119.5 days; Kruskal-Wallis:  $\chi^2=12.1$ ,  $p<0.001$ ). This effect was due to  
128 age differences between the three groups of workers (average age nurses 93.8 days,  
129 cleaners 124.2 days, foragers, 159.4 days; Kruskal-Wallis:  $\chi^2=138.6$ ,  $p<0.00001$ ).  
130 When only nurses were considered, there was no significant age difference between  
131 transporters and non-transporters (Kruskal-Wallis:  $\chi^2=0.81$ ,  $p=0.37$ ; insufficient data  
132 was available to conduct similar tests for nest cleaners and foragers).

133

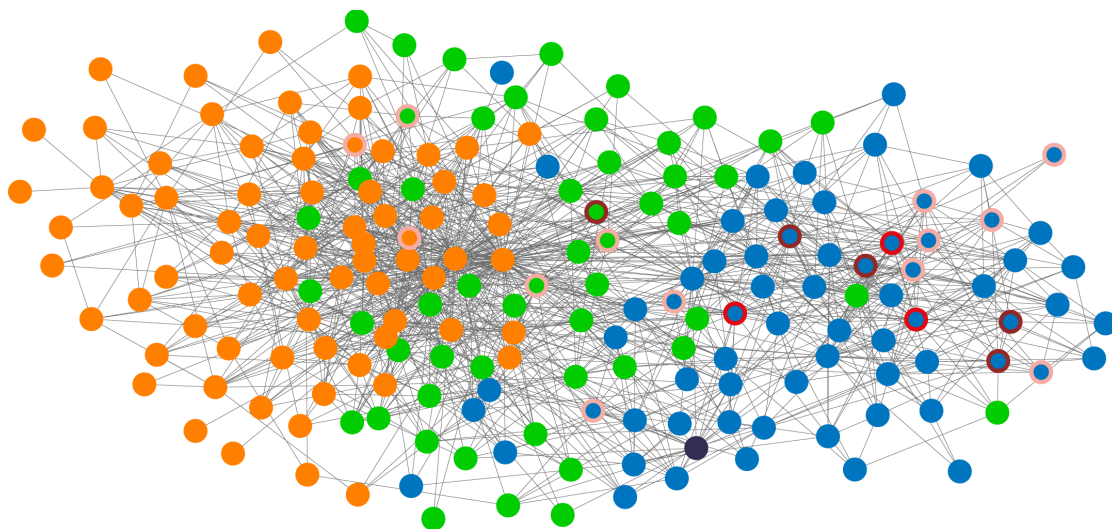

134

135 **Fig 3. Transporters are mainly nurses.** The network shown is that of colony 10 on day 4.  
136 Each node represents a worker, and links between nodes are shown for workers who had  
137 more than 10 interactions on that day. The network layout is a spring embedded layout.  
138 Group membership is indicated by the node colour: nurse (blue), cleaner (green), forager  
139 (orange). Red-shaded circles around nodes highlight transporters, with light red indicating  
140 transports on one day, medium red indicating transports on two days, and dark red  
141 indicating transports on three days.

142

### 143 *Transporters gather information themselves*

144 To determine whether workers make use of information available to others to decide  
145 when to initiate brood transport, we tracked the information available to each worker  
146 after the light was turned off. Because the nest entrance was constructed with two  $90^\circ$

147 bends and painted in matt black on the inside thereby preventing light from entering  
148 the nest, the only means for workers to know whether there was light in the tunnel  
149 was to access it. Workers were therefore considered as having private information  
150 once they had left the nest for at least three seconds, which is the minimum amount of  
151 time an ant needs to reach the tunnel and return to the nest. Ants were considered as  
152 socially informed once they interacted with a privately informed worker.

153

154 At the start of brood transport, only  $31.6\% \pm 2.9\%$  of all workers and  $37.8\% \pm 8.7\%$  of  
155 the nurses had private information. However, almost all transports (99.8%) were  
156 performed by privately informed ants. Of the seven workers, which had not visited the  
157 tunnel before initiating brood transport, four had transported brood on previous days  
158 (Fig. 2). The three remaining workers had visited the tunnel the nights before when it  
159 contained brood. Thus, these transporters may have used this information together  
160 with circadian timing to initiate transport<sup>24,25</sup>. Therefore, these observations suggest  
161 that private information is the primary or only source of information workers use to  
162 decide when and where to transport the brood.

163

#### 164 *Transporters neither communicate nor recruit help*

165 Five lines of evidence further support the view that workers do not use information  
166 obtained from other workers to initiate brood transport. First, transporters did not  
167 increase their interaction frequency with other workers once it was dark in the tunnel.  
168 The rate of interactions in the hour preceding light-off was not significantly different  
169 from the rate during the interval between light-off and the first brood transport  
170 (Kruskal-Wallis:  $\chi^2=0.05$ ,  $p=0.82$ ; Supplementary Fig. 3). Second, transporters did not  
171 change their activity after interacting with a privately informed ant. Their increase in  
172 speed — a signature of information transfer in ants<sup>28</sup> — was similar after interacting  
173 with a privately informed or an uninformed ant (Kruskal-Wallis:  $\chi^2=2.8$ ,  $p=0.09$ , see  
174 Supplementary Table 1). Third, brood accumulating in the tunnel did not speed up the  
175 recruitment of additional transporters. The average time elapsed before one additional  
176 worker contributed to brood transport was  $16.6 \pm 3.4$  min. The number of workers  
177 already participating in brood transport did not alter the time needed to rally an  
178 additional worker (Spearman rank correlation:  $\rho=0.06$ ,  $p=0.60$ ; Supplementary Fig.  
179 4). Fourth, the first interaction with a privately informed ant did not trigger a change



180 in behaviour. After interacting with a privately informed ant, transporters and non-  
181 transporters were neither more likely to approach the nest entrance (Wilcoxon signed  
182 rank test: transporters:  $V=1232$ ,  $p=0.79$ ; non-transporters:  $V=495789$ ,  $p=0.97$ ) nor to  
183 orient towards it (Rao's spacing test for uniformity: transporters: Test  
184 Statistic=139.98,  $p>0.05$  with a critical value=148.34; for non-transporters: Test  
185 Statistic=134.13,  $p>0.05$  with a critical value=136.94; Fig. 4A, 4B). Simulations were  
186 conducted to determine the expected effect if 90%, 50%, 10% or 0% of the  
187 transporters were able to understand a message that they should go to the tunnel after  
188 interacting with a privately informed ant (Fig 4C). These simulations revealed that the  
189 observed pattern was consistent with a complete lack of communication between  
190 privately informed ants and non-informed transporters. Finally, and most importantly  
191 we did not observe any successful recruitment through tandem running although these  
192 ants are capable of tandem running (see Supplementary Videos 2, 3).  
193

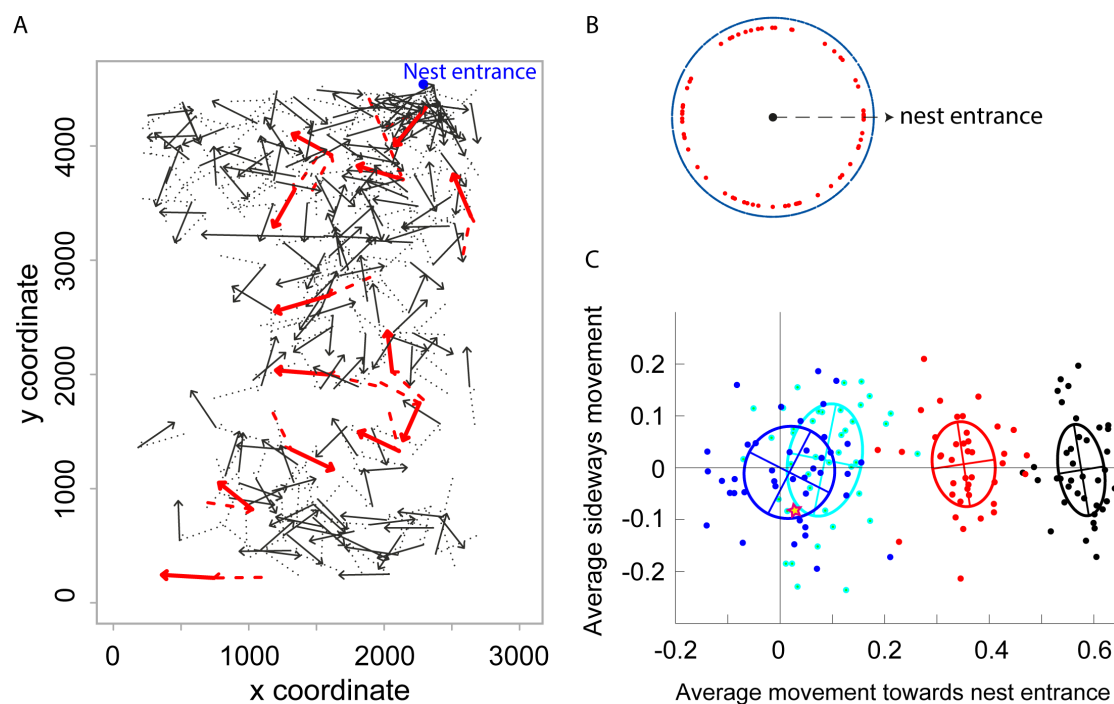

194  
195 **Fig 4. No evidence for communication between workers.** (A) Changes of trajectory  
196 following the first interaction with a privately informed ant. Dotted lines indicate the  
197 trajectories before the first interaction with a privately informed ant and solid lines the  
198 trajectory after the first interaction. Transporter trajectories are in red and those of other  
199 ants in black. The blue circle indicates the nest entrance. Data shown are those of colony 1  
200 on day 5. (B) Distribution of directions after the first interaction with a privately informed  
201 ant. Each dot represents the direction relative to the nest entrance of a single worker on a



202 given day. Red dots indicate transporters and blue dots (forming a ring) indicate other  
203 ants. The arrow indicates the direction of the nest entrance. (C) Expected change in  
204 direction from simulated data in which 0% (blue), 10% (cyan), 50% (red) or 90% (black) of  
205 the ants understood a message. Each dot is the average movement towards the nest  
206 entrance of 66 simulated transporters. The cross and ellipse show the average and the  
207 standard deviation across 40 simulations with the same set of parameters. The star shows  
208 the average of the observed data.  
209

### 210 *Colonies do not use quorum sensing to initiate brood transport*

211 At the colony level there was also no indication of a system of quorum sensing  
212 leading to the onset of brood transport. At the time of first transport, the percentage of  
213 privately and socially informed workers and the percentage of workers in the tunnel  
214 varied greatly (privately informed: 0.6% to 12.0%; socially informed: 1.9% to 47.5%,  
215 ants in tunnel: 6.0% to 19.4%; Fig. 5). Furthermore, the use of a quorum would imply  
216 that colonies deferred the onset of brood transport on some days for almost one hour  
217 after reaching the quorum, while starting to transport just minutes after reaching the  
218 quorum on other days (delays for privately informed: 4.3–59.8 minutes; socially  
219 informed: 2.8–58.8 minutes; ants in tunnel: 5.4–59.1 minutes). Given that the  
220 variability was large for both the quorum threshold and the delay until transport onset,  
221 it seems unlikely that a minimum colony level information threshold or a minimum  
222 ant proportion in the tunnel needs to be reached for brood transport to be initiated.  
223

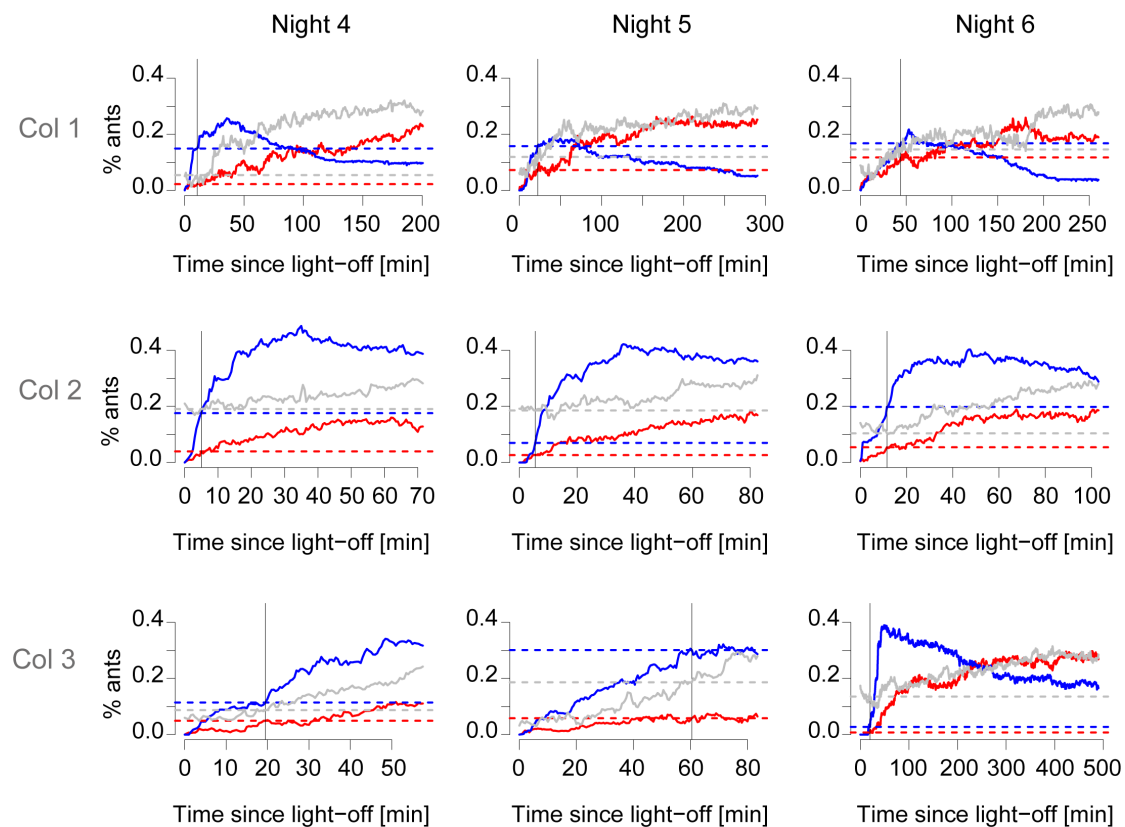

224

225 **Fig 5. No evidence for a quorum threshold triggering brood transport.** Each line shows  
226 the percentage of ants: privately informed ants in red, socially informed ants in blue, ants  
227 in the tunnel in grey. The vertical line indicates when the first transport occurred, and the  
228 dashed lines highlight the percentages of ants at the time of first transport.

229

230 Finally, our analyses also revealed high consistency in the direction of brood transport  
231 (Supplementary Fig. 5). Overall, there were only 20 return-transports (2.3%) among  
232 the 859 transports recorded. Interestingly, the majority of the workers (69.2%)  
233 performing return transports did not transport brood to the tunnel while the vast  
234 majority (91.7%) of the workers transporting brood to the tunnel did not perform  
235 return-transports.

236

## 237 Discussion

238 The use of an automated system allowed us to obtain detailed and individual-level  
239 information on the processes regulating brood transport in response to environmental  
240 changes, a process central to the organization of social insect colonies. Overall,  
241 workers quickly transported the brood to the preferable location after the light was  
242 turned off, and workers almost never transported brood in the wrong direction.

243 However, this seemingly coordinated transport occurred without any detectable sign  
244 of communication among workers. While workers frequently interacted, these  
245 interactions resulted in no visible change in the behaviour of the transporters, even if  
246 the interaction partner had knowledge about the tunnel being dark. Instead,  
247 transporters appeared to rely exclusively on self-gathered information, because they  
248 initiated brood transport only after having noticed the change of state of the tunnel  
249 themselves. Together, these data indicate that synchronised behaviour at the colony  
250 level can occur without communication.

251

252 Visual inspections of our videos also revealed no evidence that workers relied on  
253 chemical signals to initiate and communicate brood transport. Transporters never  
254 dragged their gaster over the ground, as ants typically do when depositing trails. There  
255 were also no instances of worker tandem running, thereby excluding targeted  
256 recruitment that could have been mediated by secretions from a gland<sup>13</sup>. The only  
257 targeted recruitment that we observed was that of the queen and in one instance that of  
258 non-transporting workers (see Supplementary Videos 2, 3). In these cases a worker  
259 approached the head of the queen or worker and pulled on her mandibles, with the  
260 effect that the pulled ant became active and followed the worker in a tandem-run to  
261 the tunnel.

262 The observed lack of communication is likely due to the inherent difficulty of reliably  
263 communicating a message in a noisy environment. Communication requires that an  
264 informed individual intentionally encodes a message, transmits it successfully, and  
265 that an uninformed individual is able to receive it, decode it, and act upon it<sup>29</sup>. Ants  
266 have a limited ability to convey a message through tactile communication alone<sup>28,30,31</sup>.  
267 In addition, the density of workers is extremely high in the nest, resulting in numerous  
268 interactions not only with informed individuals but also with uninformed ones. Such a  
269 situation leads to a very noisy system where conflicting feedbacks may readily  
270 compromise any attempts of communication. Moreover, investing time in recruiting a  
271 helper would only be beneficial if the time needed for successful recruitment is short,  
272 and if recruitment occurs early on (see Figure 6).

273

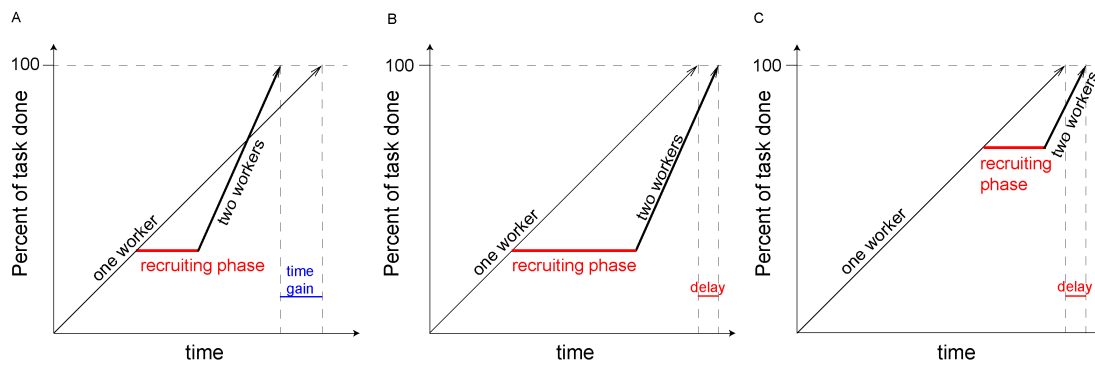

274

275 **Figure 6. Cost and benefit of successful recruitment.** The cost of recruiting help is  
276 indicated in red. The benefit obtained from recruiting a helper is shown in blue. (A)  
277 Recruiting a helper early and rapidly enables faster completion of the brood transport than  
278 without a helper. (B) Recruiting a helper early but slowly delays the completion of the  
279 brood transport compared to a situation without a helper. (C) Recruiting a helper rapidly  
280 but late also delays the completion of the brood transport compared to a situation without  
281 a helper.

282

283 Our observation that transporters check the state of the tunnel themselves, before  
284 starting to transport brood, suggests that individual workers gather cues from the  
285 environment before deciding to transport brood. The most likely cues used by the  
286 transporters in our experiments are the confinement, absence of light and presence of  
287 workers in the tunnel<sup>32,33</sup>. The use of cues for decision-making also occurs in other  
288 ants, and for processes unrelated to brood transport. For instance, in harvester ants,  
289 potential foragers decide whether or not to initiate a foraging trip based on the  
290 frequency with which they meet returning foragers<sup>34,35</sup>. Workers of the black garden  
291 ant *Lasius niger* use the chemical profile of the nest wall and their own body size  
292 compared to the height of nest pillars as cues to decide whether to switch from wall  
293 building to building a roof<sup>36</sup>. These data, together with our results, suggest that the use  
294 of cues as a mean to obtain private information might be more widespread and easier  
295 to implement in ant colonies than information exchange through tactile  
296 communication.

297 The use of cues combined with the lack of communication and the absence of a  
298 quorum means that transporters most likely decide independently of each other  
299 whether, when and where to transport the brood. Such individual-led decisions are  
300 further supported by rare instances in which a worker mistakenly returned brood from

301 the tunnel to the nest, while transporters were already moving brood to the tunnel.  
302 Interestingly, the vast majority of transporters arrived at the same decision and  
303 transported brood from the nest to the tunnel. This strong uniformity in behaviour  
304 suggests that there is high homogeneity in preferences among group members.

305 Our results indicate that colonies can display synchronized behaviour without  
306 communicating thus emphasizing that not all group-level behaviours in social insects  
307 are driven by communication. We suspect that communication is context-dependant  
308 and only used when cue-based options are insufficient. For instance, the  
309 communication that precedes brood transport in house-hunting ants occurs in the  
310 context of an emergency after their nest has been destroyed<sup>9,14</sup>. In contrast,  
311 synchronization without communication is optimal when reliable communication is  
312 expensive, hard to achieve, or when perfect synchrony is not needed<sup>29,37</sup>. It can be  
313 achieved if workers share similar preferences and react to the same cues, which are  
314 limited in time. In our experiments light in the tunnel acted as this strong time-limited  
315 cue. Synchronized group behaviour exists also in solitary bees, who congregate at  
316 nesting sites for reproduction<sup>38</sup>, bats and starlings that converge at seasonal feeding  
317 and sleeping spots<sup>39,40</sup> and Mormon crickets, who migrate in masses in search for salt  
318 and proteins<sup>41</sup>. In ants simulations further suggest that food choice during foraging  
319 could be achieved without communication through individual learning and  
320 preference<sup>42</sup>.

321  
322 Our results also revealed that only a tiny fraction of the individuals, 1.5%–6.6% of the  
323 colonies' workforce —as few as three workers in some cases— contributed to brood  
324 transport. Moreover, within colonies there was strong variation in the relative  
325 contribution of workers with more than 80% of all transports being carried out by less  
326 than 1.8% of the workers. Similar fractions of transporters and workload disparities  
327 were observed in colony emigrations of *Formica sanguinea* and *Camponotus*  
328 *sericeus*<sup>43</sup>. The large variability in behaviour is puzzling and we offer two possible  
329 explanations. There could be specialist nurses that focus on brood transport. Indeed  
330 nine out of 48 transporters moved brood every single night and did slightly less than  
331 half of the work, thus acting as key individuals<sup>44</sup> during the brood displacement.  
332 Similar specialization has been reported for foraging, brood care, stone  
333 collection<sup>45,46,47</sup> and could result from inherent and consistent differences between

334 workers, for example in motivation, physiology, or sensory threshold<sup>48,49</sup>. Another  
335 explanation is that transporters represent a varying subset of the nurses, whose  
336 likelihood to transport depends on the individual's state in the early night. This idea is  
337 supported by the observation that two thirds of the transporters only worked a single  
338 night.

339 Importantly, a small minority of transporters imposed their transport decision on the  
340 colony. Such an outcome was only possible because the other workers did not oppose  
341 the brood transports or if they did so initially, never persisted in their opposition.  
342 Minority-driven behaviour occurs also in *Paratrechina longicornis* ants, where a  
343 single worker can temporarily decide the pull direction during collective transport<sup>50</sup>.  
344 Our results therefore highlight that a small minority of the workforce can determine  
345 the colony fate through persistent activity in a largely indifferent society. Similar  
346 observations exist for fish schools and human crowds where few knowledgeable  
347 individuals can lead large groups of uninformed individuals to a new location<sup>51,52</sup>.  
348 Ultimately, the social unresponsiveness of the majority might be the optimal strategy  
349 because social unresponsiveness can ensure that the colonies react to environmental  
350 change while also being robust to noise and avoiding losses in information accuracy  
351 resulting from an over-reliance on social information<sup>53</sup>.

352

353 **Acknowledgements.** We thank M. Chapuisat, O. Feinerman, N. Stroeymeyt, T.  
354 Richardson, T. Kay and S. McGregor for comments on an earlier version, and B.  
355 Sutcliffe for proofreading. DPM was supported by a grant from HFSP, JPE was  
356 supported by an advanced ERC grant, LK was supported by grants from the Swiss  
357 NSF and an advanced ERC grant.

358

359 **Contribution.** DPM and LK planned the experiment. DPM and AC designed the  
360 experimental system and performed the experiment. DPM and JPE analysed and  
361 interpreted the data. DPM wrote the paper with input from JPE and LK. All authors  
362 revised the paper.



## 363 **Material and Methods**

364 The three colonies were each established from a single queen collected after a mating  
365 flight in Tel Aviv on March 23<sup>rd</sup> 2007. The experiment started when queens were 3  
366 years old, out of a maximum life span of 26 years<sup>54</sup>. At the start of the experiment,  
367 colonies each comprised a queen, brood and 197, 192 and 206 workers, for colonies 1,  
368 2 and 3 respectively. The colony sizes were those naturally reached by queens of that  
369 age, and reflect normal growth rates in the laboratory; no data are available for field  
370 colonies. All workers were the offspring of a single queen, which in *Camponotus*  
371 *fellah* is usually singly-mated<sup>55</sup>.

372 To determine workers' age, new-born workers were paint-marked on a weekly basis  
373 during the 12 months preceding the experiment. Because 38 out of the 45 transporters  
374 were nurses, we limited the analysis on the effect of age to nurses only.

375

376 During experiments colonies were kept in a dark nest chamber connected by a 60 cm  
377 long and 1cm wide tunnel to a foraging chamber. The tunnel and the foraging box had  
378 12h light-12h dark cycles, and the ants had access to food (gelatinous sugary water)  
379 and water in the foraging box. The temperature (30 °C), humidity (60%), light  
380 (~500 Lux), and food supply were computer-controlled, and both chambers were  
381 filmed from above with high-resolution monochrome cameras operating under  
382 infrared light, as previously described<sup>27</sup> (Supplementary Fig. 1). All colony members  
383 were video-tracked using fiducial identification labels over 14 consecutive days. We  
384 recorded the position and orientation of all individuals twice per second.

385

386 During the night, workers transported the brood to the tunnel and brought it back to  
387 the nest at dawn, presumably because they prefer to keep the brood in a confined  
388 environment rather than an open environment when both are dark. We tracked the  
389 transport of brood items manually during three consecutive nights. A brood transport  
390 was defined as the time interval from when an ant collected one (or several) brood  
391 items from the nest box, to when the ant disappeared with it into the tunnel. We also  
392 recorded cases where brood was transported from the tunnel to the nest. In these  
393 return-transport, the transport was defined as the time interval from when the ant  
394 entered the nest with brood until the ant dropped the brood. For each transporter and  
395 each night we defined its workload as the number of transports during that night and

396 its work time as the time from the start of its first transport until the end of its last  
397 transport. Using the work times of all workers, we estimated synchrony as the  
398 percentage of time during which at least two workers worked in parallel. We also  
399 visually inspected the videos for instances of tandem running, that is events where one  
400 ant guides another ant to the tunnel. A tandem-run results in successful recruitment if  
401 the follower ant subsequently starts transporting brood.

402

403 We did not track brood transports in the mornings when the lights turned on in the  
404 tunnel, because in these conditions all ants in the tunnel were immediately informed  
405 of the environmental change, thus making the question of communication inane.

406

407 To determine group membership of each worker, *i.e.* nurse, cleaner or forager, we  
408 used the same approach as in Mersch *et al.* (2013)<sup>27</sup>. In brief, we inferred all social  
409 interactions between workers based on their distance and orientation, and analysed the  
410 social networks with the Infomap algorithm<sup>26</sup> to assign each worker to a group.  
411 Because the majority of workers were in the tunnel at night and thus undetectable  
412 with our tracking setup, we built daily interaction networks using only data collected  
413 between 8am and 7pm, when the majority of workers were detectable.

414

415 To measure the speed change following interactions, we calculated the speed during  
416 the 10 seconds prior to the interaction and during the 10 seconds after the interaction.  
417 We included only those interactions for which we had data on the speed before the  
418 interaction for both partners and on the speed after the interaction for the focal ant. As  
419 a consequence, 50 interactions (10.2%) were excluded from the analysis. Excluding  
420 these interactions had neither an impact on the average duration of an interaction  
421 ( $10.5 \pm 29.9$  s *vs.*  $10.3 \pm 30.5$  s) nor on the proportion of interactions with privately  
422 informed partners (7.72% *vs.* 7.69%). To further ensure that our results are not  
423 influenced by the chosen interval (10 s), we repeated the same analyses for shorter  
424 (5 s) and longer (20 s) time intervals. Because the results were the same for all time  
425 intervals (see Supplementary Table 1), we only report data for the 10-second interval.

426

427 To investigate whether a privately informed ant can communicate information about  
428 the change of state in the tunnel to its interaction partner we estimated the change in

429 trajectory of each worker following its first interaction with a privately informed ant.  
430 We calculated the heading of the ant's trajectory after it had moved away from the  
431 interaction point, transforming data of all colonies so that an orientation of  $0^\circ$   
432 corresponds to an orientation towards the nest entrance. We also calculated the  
433 distance to the entrance at the time of the interaction and after the ant had moved at  
434 least 2 cm ( $\approx$  queen body length) away from the interaction point. Workers who did  
435 not interact with a privately informed ant before the end of the brood transport were  
436 not included in the analysis (351 out of 1785 ant-days excluded).

437

438 To estimate how communication about the change of state in the tunnel could modify  
439 the trajectory of workers, we generated simulated datasets in which 0%, 10%, 50% or  
440 90% of the transporters moved toward the nest entrance after interacting with a  
441 privately informed ant. Understanding the message meant that one bit —that is, one  
442 unit of information— was transferred from the privately informed ant to the  
443 transporter. Such one-bit information could convey two options —towards and away  
444 from nest entrance— and signal to the transporter to move towards the nest entrance.  
445 Each dataset was the average of 66 simulated direction vectors  $v_j$  defined as

446 
$$v_j = (\cos(\alpha_j), \sin(\alpha_j))$$

447 with  $\alpha_j$  being the angle of the direction relative to the line connecting the interaction  
448 point with the nest entrance. For each informed transporter, we randomly chose a  
449 direction from a uniform distribution limited to angles between  $-\pi/2$  and  $\pi/2$ , for all  
450 other transporters we randomly chose an angle from a uniform distribution between  $-\pi$   
451 and  $\pi$ . We repeated this process 40 times for each information level. We also  
452 calculated the average direction of the 66 transporters from the observed data.

453

454 To test whether a quorum triggered the observed brood transport, we determined the  
455 number of ants, the number of informed ants, and the number of ants in the tunnel at  
456 the time of the first brood transport. To estimate whether the quorum induced brood  
457 transport, we also calculated the duration between the time the quorum was reached  
458 for the first time and the first brood transport. Because the estimated quorum varied  
459 between colonies and days, we calculated the delays for all colonies and days using  
460 the smallest estimated quorum threshold.

461 We performed all statistical analysis in R (Version 3.4.0)<sup>56</sup>. When the test assumptions  
462 were met, we used two-tailed parametric tests and included the colony ID as a random  
463 factor in our analysis; otherwise we used non-parametric tests. For statistical tests on  
464 colonies, each colony was one replicate. For statistical tests on individual workers,  
465 each transporter on each day was a replicate. The data analysis code will be available  
466 as a zip file after publication in a journal.

467 The data used to prepare all figures and perform statistical tests will be available on  
468 Dryad DOI after publication in a journal.

469

## 470 **References**

471

- 472 1. Kaartvedt S, Ugland KI, Klevjer TA, Røstad A, Titelman J, Solberg I (2015)  
473 Social behaviour in mesopelagic jellyfish. *Scientific Reports* 5:11310. DOI:  
474 10.1038/srep11310
- 475 2. Kiriazis J, Slobodchikoff CN (2006) Perceptual specificity in the alarm calls  
476 of Gunnison's prairie dogs. *Behavioral Processes*. 73:29–35. DOI:  
477 10.1016/j.beproc2006.01.015
- 478 3. Rohrseitz K, Tautz J (1999) Honey bee dance communication: Waggle run  
479 direction coded in antennal contacts? *J Comp Physiol A* 184:463–470.
- 480 4. von Frisch K. *Tanzsprache und Orientierung der Bienen*. (Springer Verlag,  
481 Heidelberg 1965) 566
- 482 5. Conrad L, List C (2009) Group decisions in humans and animals: a survey.  
483 *Philosophical Transactions of the Royal Society of London B: Biological*  
484 *Sciences* 364:719–742. DOI: 10.1098/rstb.2008.0276
- 485 6. Pratt SC (2005) Quorum sensing by encounter rates in the ant *Temnothorax*  
486 *albipennis*. *Behav Ecol* 16:488–496. DOI: 10.1093/beheco/ari020
- 487 7. Conrad L, Roper TJ (2005) Group decision-making in animals. *Nature*  
488 421:155-8. DOI: 10.1038/nature01294
- 489 8. Seeley TD (2003) Consensus building during nest-site selection in honey bee  
490 swarms: the expiration of dissent. *Behav Ecol Sociobiol* 53:417. DOI:  
491 10.1007/s00265-003-0598-z

- 492 9. Franks NR, Pratt SC, Mallon EB, Britton NF, Sumpter DJT (2002)  
493 Information flow, opinion polling and collective intelligence in house-hunting  
494 social insects. *Philosophical Transactions of the Royal Society B: Biological*  
495 *Sciences* 357:1567–1583.
- 496 10. Britton NF, Franks NR, Pratt SC, Seeley TD (2002) Deciding on a new home:  
497 how do honeybees agree? *Proceedings of the Royal Society of London B:*  
498 *Biological Sciences* 269:1383–1388. DOI: 10.1098/rspb.2002.2001
- 499 11. Hölldobler B, Wilson EO, *The Ants* (Springer, Berlin, 1990).
- 500 12. Attygalle AB, Morgan ED, Berridge MJ, Treherne JE, Wigglesworth VB. Ant  
501 Trail Pheromones, in *Advances in Insect Physiology* (Academic Press 1985)
- 502 13. Möglich M, Maschwitz U, Hölldobler B (1974) Tandem calling: A new kind  
503 of signal in ant communication. *Science* 186:1046–1047. DOI:  
504 10.1126/science.186.4168.1046
- 505 14. Stroeymeyt N, Franks NR, Giurfa M (2011) Knowledgeable individuals lead  
506 collective decisions in ants. *J Exp Biol* 214:3046–3054. DOI:  
507 10.1242/jeb.059188
- 508 15. Amoore JE, Palmieri G, Wanke E, Blum MS (1969) Ant alarm pheromone  
509 activity: Correlation with molecular shape by scanning computer. *Science* 165:  
510 1266–1269. DOI: 10.1126/science.165.3899.1266
- 511 16. Kadochová S, Frouz J (2013) Thermoregulation strategies in ants in  
512 comparison to other social insects, with a focus on *Formica rufa*.  
513 *F1000Research* 2:280. DOI: 10.12688/f1000research.2-280.v2
- 514 17. Abril S, Oliveras J, Gómez C (2010) Effect of Temperature on the  
515 Development and Survival of the Argentine Ant, *Linepithema humile*. *J Insect*  
516 *Science* 10:97. DOI: 10.1673/031.010.9701
- 517 18. Fielde AM (1905) Temperature as a factor in the development of ants. With  
518 further observations on ants deprived of food. *Biological Bulletin* 9:361–367.  
519 DOI: 10.2307/1535632
- 520 19. Porter SD (1988) Impact of temperature on colony growth and developmental  
521 rates of the ant, *Solenopsis invicta*. *J Insect Physiol* 34:1127–1133
- 522 20. Porter SD, Tschinkel WR (1993) Fire ant thermal preferences: behavioral  
523 control of growth and metabolism. *Behav Ecol Sociobiol* 32:321–329.

- 524 21. Penick CA, Diamond SE, Sanders NJ, Dunn RR (2016) Beyond thermal  
525 limits: comprehensive metrics of performance identify key axes of thermal  
526 adaptation in ants. *Functional Ecology* 31:1091–1100. DOI: 10.1111/1365-  
527 2435.12818
- 528 22. Steiner A (1929) Temperaturuntersuchungen in Ameisennestern mit  
529 Erdkuppeln, im Nest von *Formica exsecta* Nyl. und in Nestern unter Steinen.  
530 *Z vergl Physiol* 9:1–66.
- 531 23. Kay CAR (1978) Preferred temperatures of desert honey ants (Hymenoptera:  
532 Formicidae). *J Thermal Biol* 3:213–217
- 533 24. Roces F, Núñez JA (1989) Brood translocation and circadian variation of  
534 temperature preference in the ant *Camponotus mus*. *Oecologia* 81:33–37. DOI:  
535 10.1007/BF00377006
- 536 25. Roces F, Núñez JA (1995) Thermal sensitivity during brood care in workers of  
537 two *Camponotus* ant species: Circadian variation and its ecological correlates.  
538 *J Insect Physiol* 41:659–669. DOI: 10.1016/0022-1910(95)00019-Q
- 539 26. Rosvall M, Bergstrom CT (2008) Maps of random walks on complex  
540 networks reveal community structure. *Proc Natl Acad Sci USA* 105:1118–  
541 1123
- 542 27. Mersch DP, Crespi A, Keller L (2013) Tracking individuals shows spatial  
543 fidelity is a key regulator of ant social organization. *Science* 340:1090–1093.  
544 DOI: 10.1126/science.1234316s
- 545 28. Razin N, Eckmann JP, Feinerman O (2013) Desert ants achieve reliable  
546 recruitment across noisy interactions. *J R Soc Interface* 10:20130079–  
547 20130079. DOI: 10.1098/rsif.2013.0079
- 548 29. Maynard-Smith J, Harper D. *Animal Signals*. 1st ed. Oxford: Oxford  
549 University Press; 2003.
- 550 30. Hölldobler B (1971) Recruitment Behavior in *Camponotus socius* (Hym.  
551 Formicidae). *Z vergl Physiol* 75:123–142.
- 552 31. Traniello JFA (1977) Recruitment behavior, orientation, and the organization  
553 of foraging in the carpenter ant *Camponotus pennsylvanicus* degeer  
554 (Hymenoptera: Formicidae). *Beh Ecol Soc* 2:61–79. DOI:  
555 10.1007/BF00299289.



- 556 32. Franks NR, Mallon EB, Bray HE, Hamilton MJ, Mischler TC (2003)  
557 Strategies for choosing between alternatives with different attributes:  
558 exemplified by house-hunting ants. *Anim Behav* 65:215–223. DOI:  
559 10.1006/anbe.2002.2032.
- 560 33. Symonowicz B, Kieruzel M, Szczuka A, Korczyńska J, Wnuk A,  
561 Mazurkiewicz PJ, Chiliński M, Godzińska EJ (2005) Behavioral reversion and  
562 dark–light choice behavior in workers of the red wood ant *Formica polyctena*.  
563 *J Insect Behav* 28:245–256. DOI: 10.1007/s10905-015-9496-2.
- 564 34. Greene MJ, Gordon DM (2007) Interaction rate informs harvester ant task  
565 decisions. *Behav Ecol* 18:451–455. DOI: 10.1093/beheco/arl105.
- 566 35. Pinter-Wollman N, Bala A, Merrell A, Queirolo J, Stumpe MC, Stumpe,  
567 Holmes S, Gordon DM (2013) Harvester ants use interactions to regulate  
568 forager activation and availability. *Anim Behav* 86:197–207. DOI:  
569 10.1016/j.anbehav.2013.05.012.
- 570 36. Khuong A, Gautrais J, Perna A, Sbaï C, Combe M, Kuntz P, Jost C, Theraulaz  
571 G (2016) Stigmergic construction and topochemical information shape ant nest  
572 architecture. *Proc Natl Acad Sci USA* 113:1303–1308. DOI:  
573 10.1073/pnas.1509829113
- 574 37. Dostálková I, Špínka M (2007) Synchronization of behaviour in pairs: the role  
575 of communication and consequences in timing. *Animal Behav* 74:1735e1742.  
576 DOI:10.1016/j.anbehav.2007.04.014
- 577 38. Kierat J, Filipiak M, Szentgyörgyi H, Woyciechowski M (2017) Predation  
578 Cues in Solitary bee Nests. *Journal of Insect Behavior* 30:385–393. DOI:  
579 10.1007/s10905-017-9626-0
- 580 39. Lewis SE (1994) Night Roosting Ecology of Pallid Bats (*Antrozous pallidus*)  
581 in Oregon. *The American Midland Naturalist* 132: 219–226
- 582 40. Caccamise DF, Morrison DW (1986) Avian Communal Roosting:  
583 Implications of Diurnal Activity Centers. *The American Naturalist* 128:191–  
584 198. DOI: 10.1086/284553
- 585 41. Simpson SJ, Sword GA, Lorch PD, Couzin ID (2006) Cannibal crickets on a  
586 forced march for protein and salt. *Proc Natl Acad Sci USA* 103:4152–4156.  
587 DOI: 10.1073/pnas.0508915103
- 588 42. Oberhauser FB, Koch A, Czaczkes TJ (2018) Small differences in learning

- 589 speed for different food qualities can drive efficient collective foraging in ant  
590 colonies. bioRxiv preprint. DOI: 10.1101/274209
- 591 43. Möglich M, Hölldobler B (1974) Social carrying behavior and division of  
592 labor during nest moving in ants. *Psyche* 81:219–236. DOI:  
593 10.1155/1974/25763
- 594 44. Robson S, Traniello J. Key individuals and the organisation of labor in ants, in  
595 *Information Processing in Social Insects* (Birkhäuser ed. 1999) pp. 239–259
- 596 45. Hammel B, Vollet-Neto A, Menezes C, Nascimento FS, Engels W, Grüter C  
597 (2016) Soldiers in a Stingless Bee. *The American Naturalist* 187:120–129.  
598 DOI: 10.1086/684192
- 599 46. Dornhaus A (2008) Specialization Does Not Predict Individual Efficiency in  
600 an Ant. *PLoS Biology* 6:e285. DOI: 10.1371/journal.pbio.0060285
- 601 47. Robson SKA, Traniello JFA (2002) Transient division of labor and behavioral  
602 specialization in the ant *Formica schaufussi*. *Naturwissenschaften* 89:128–131
- 603 48. Pruitt JN, Keiser CN (2014) The personality types of key catalytic individuals  
604 shape colonies' collective behaviour and success. *Animal Behav* 93:87–  
605 95. DOI: 10.1016/j.anbehav.2014.04.017
- 606 49. Robinson GE (1992) Regulation of Division of Labor in Insect Societies.  
607 *Annual Review of Entomology* 37:637–665. DOI:  
608 10.1146/annurev.en.37.010192.003225
- 609 50. Gelblum A, Pinkoviezky I, Fonio E, Ghosh A, Gov N, Feinerman O (2015)  
610 Ant groups optimally amplify the effect of transiently informed individuals.  
611 *Nature Communications* 6: 7729. DOI: 10.1038/ncomms8729
- 612 51. Reeb SG (2000) Can a minority of informed leaders determine the foraging  
613 movements of a fish shoal? *Anim. Behav* 59:403–409.  
614 DOI:10.1006/anbe.1999.1314.
- 615 52. Dyer JRG, Johansson A, Helbing D, Couzin ID, Krause J (2009) Leadership,  
616 consensus decision making and collective behaviour in humans. *Phil Trans R*  
617 *Soc B* 364:781–789. DOI: 10.1098/rstb.2008.0233.
- 618 53. Torney CJ, Lorenzi T, Couzin ID, Levin SA (2015) Social information use  
619 and the evolution of unresponsiveness in collective systems. *J R Soc Interface*  
620 12:20140893. DOI: 10.1098/rsif.2014.0893.

- 621 54. Vonshak M, Shlagman A (2009) A *Camponotus fellah* queen sets a record for  
622 Israeli ant longevity. *Isr J Entomology* 39: 165–168
- 623 55. Mersch DP, La Mendola C, Keller L (2017) *Camponotus fellah* queens are  
624 singly mated. *Insect Soc* 64:269–276. DOI: 10.1007/s00040-017-0543-1
- 625 56. R Core Team (2017) R: A language and environment for statistical computing.  
626 R Foundation for Statistical Computing, Vienna, Austria. URL [https://www.R-](https://www.R-project.org/)  
627 [project.org/](https://www.R-project.org/).
- 628

629 **Supplementary material**

630

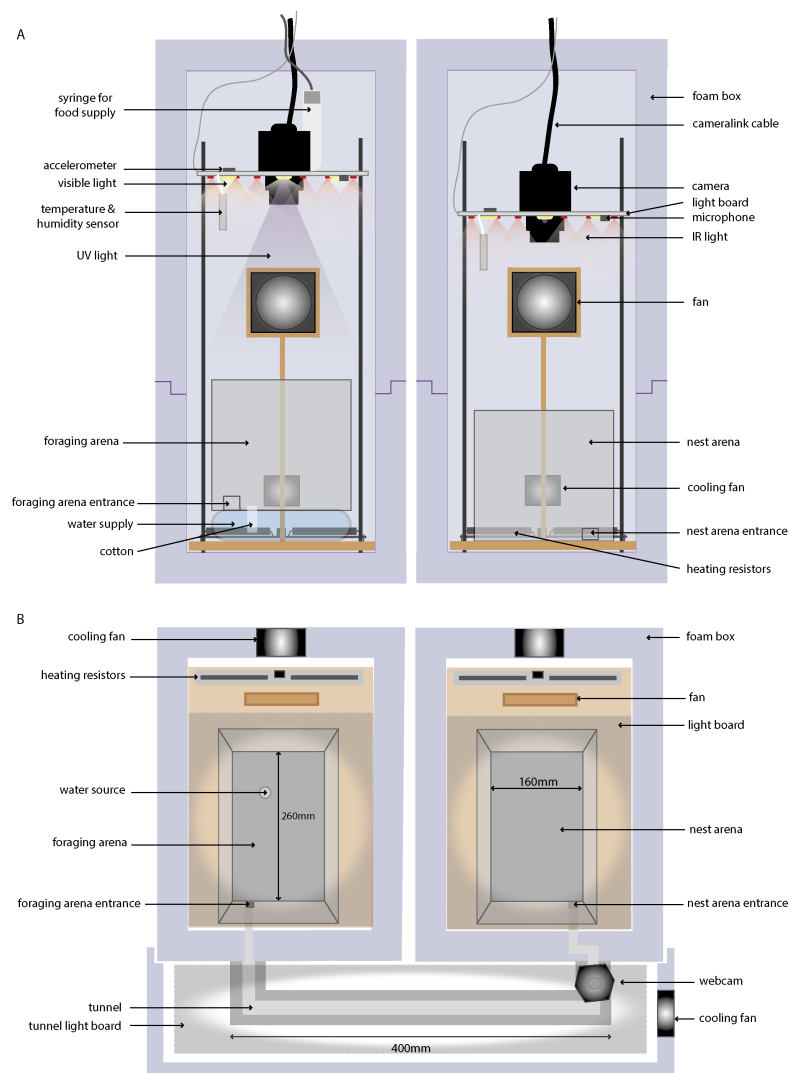

631

632

633 **Supplementary Figure 1:** Tracking setup (A) Lateral view (B) Top view; reproduced with

634 permission from Mersch *et al.* (2013)<sup>27</sup>

635

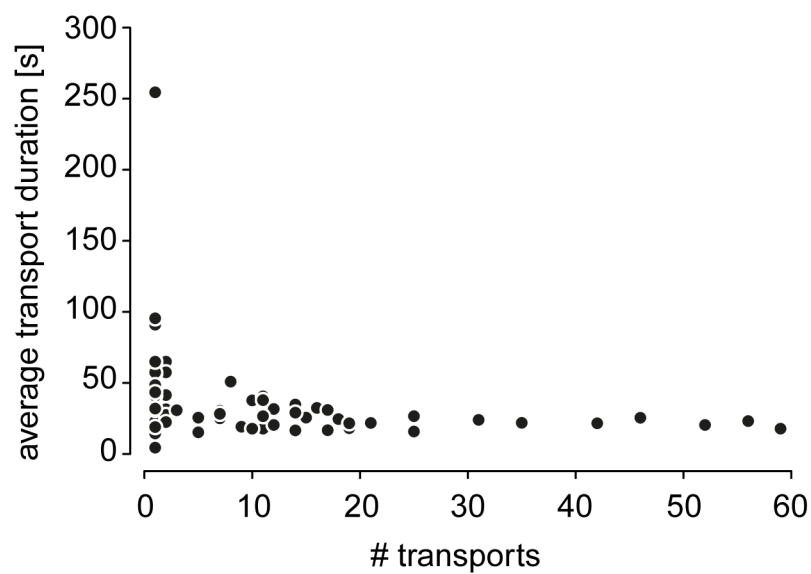

636

637

638 **Supplementary Figure 2. Individual workers transport brood rapidly.** Each black dot

639 shows the average transport time needed by a single transporter.

640

641

642

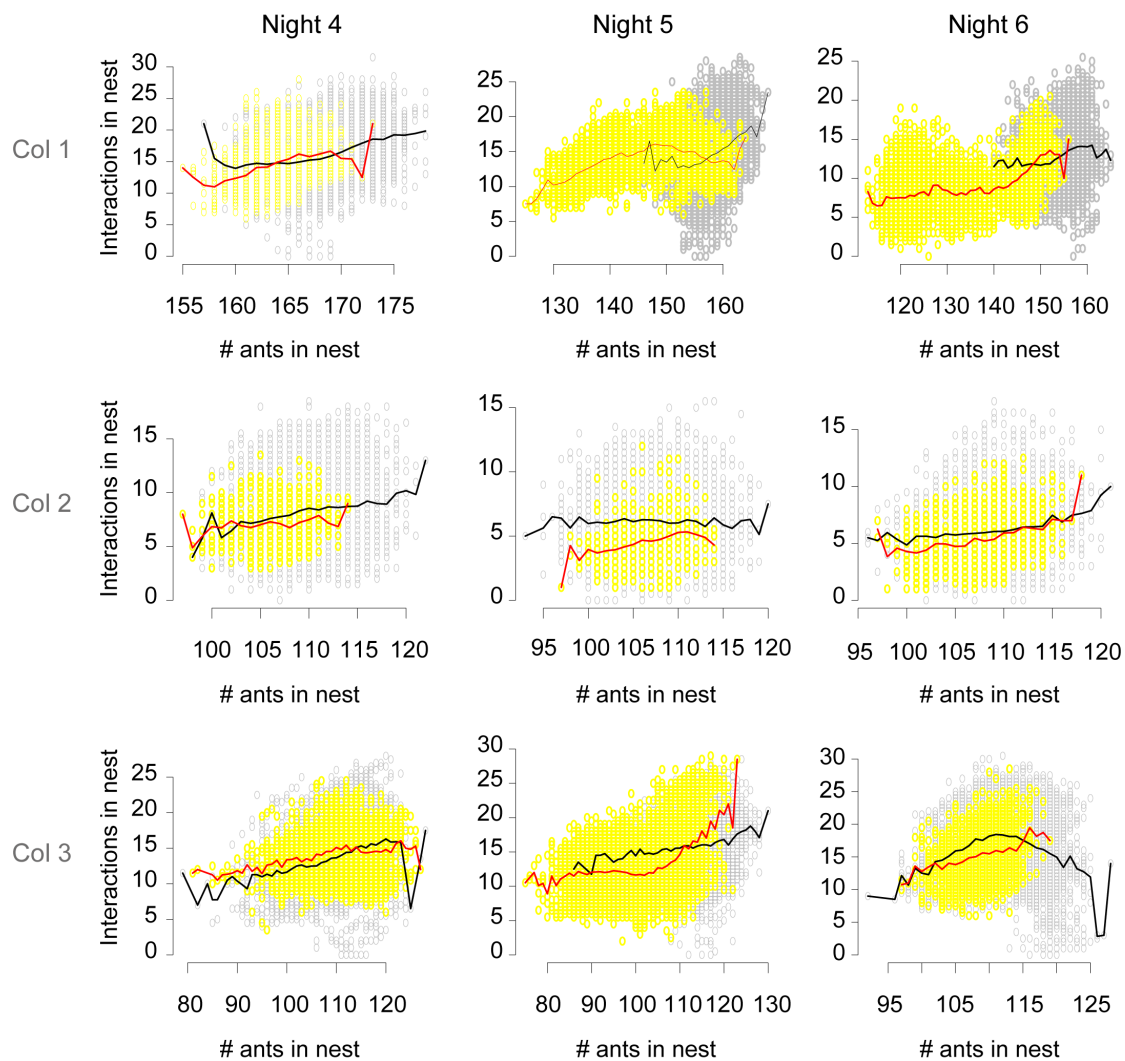

643

644

645 **Supplementary Figure 3. No change in interaction frequencies after light-off.** Grey

646 dots show data in the hour preceding light-off. Yellow dots show data between light-off

647 and the first transport. The black line shows the average relationship between the number

648 of ants in the nest and the number of interactions before light-off, and the red line shows

649 the same relationship in the interval between light-off and the first brood transport.

650



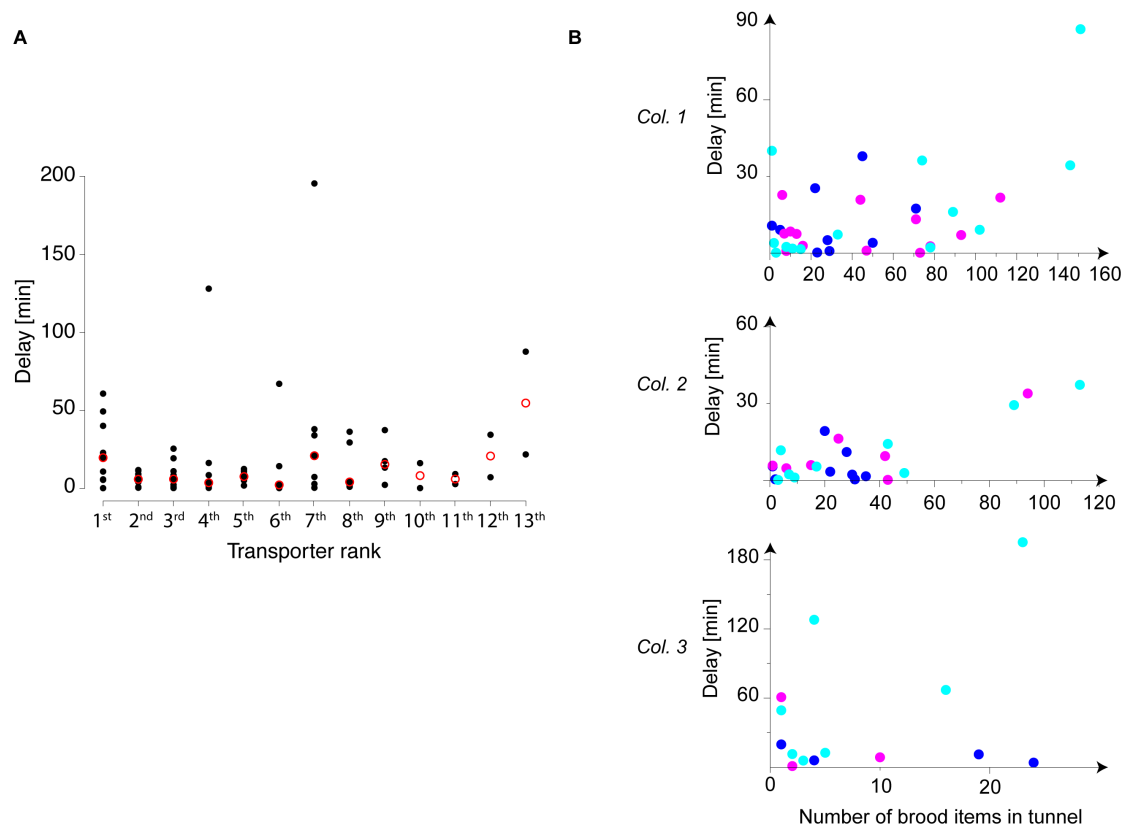

651

652

653 **Supplementary Figure 4. Brood accumulation in the tunnel does not speed up**

654 **transporter recruitment.** A. Each black dot shows the recruitment delay. For all but the

655 first transporter, recruitment delays are with regard to the transport start of the previous

656 transporter. For the first transporter, recruitment delays are with regard to light-off. Red

657 circles indicate the median recruitment delay for each transporter rank. B. The recruitment

658 delays are the same as in A. Blues dots show data for night 4, magenta dots data for night

659 5, and cyan dots data for night 6. Data are shown separately for each colony.

660

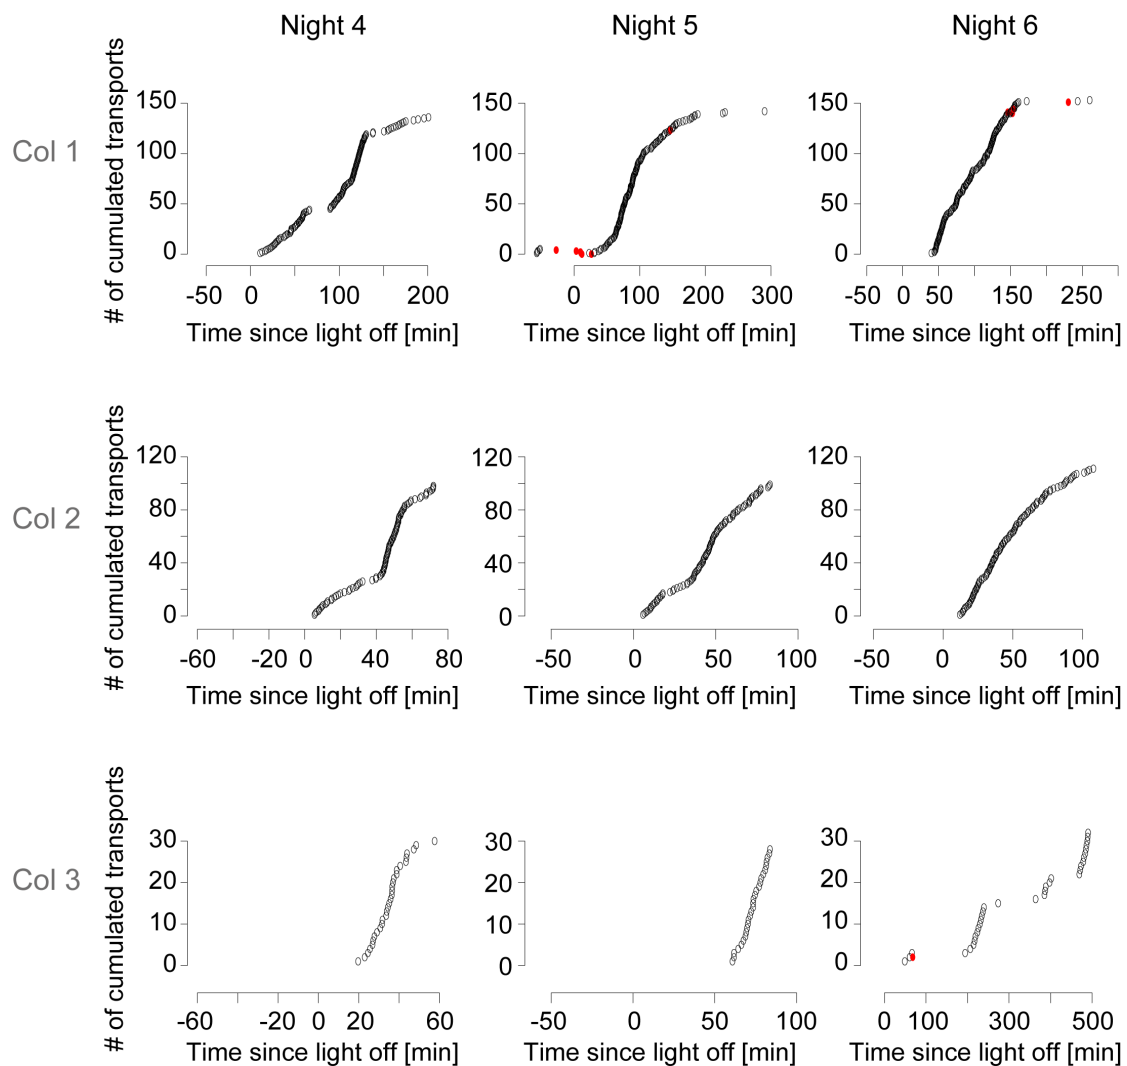

661

662

663 **Supplementary Figure 5. Workers transport almost exclusively from the nest to the**

664 **tunnel.** Grey dots show transports from the nest to the tunnel. Red dots show transports

665 from the tunnel to the nest.

666

667

| Interval length for speed estimate (s) | #interactions excluded due to missing speed data(%) | Speed increase after an interaction with a privately informed ant (mm/s);mean±std | Speed increase after an interaction with a non privately informed ant(mm/s); mean±std | Kruskal-Wallis Chi2 | p-value |
|----------------------------------------|-----------------------------------------------------|-----------------------------------------------------------------------------------|---------------------------------------------------------------------------------------|---------------------|---------|
| 5                                      | 79 (12.9)                                           | 0.89±2.3                                                                          | 0.26±3.1                                                                              | 3.25                | 0.071   |
| 10                                     | 50 (10.2)                                           | 0.25±2.8                                                                          | 0.15±2.9                                                                              | 2.77                | 0.096   |
| 20                                     | 20 (6.3)                                            | 0.23±1.8                                                                          | 0.07±2.3                                                                              | 3.09                | 0.079   |

668

669 **Supplementary Table 1. Speed change after an interaction with a privately informed**

670 **ant.**

671

672

673 **Supplementary Video 1. Worker transporting brood.** Worker 62 transports brood to the  
674 tunnel. At 16s in the video, ant 62 takes brood directly from another worker without this  
675 worker changing its behaviour. Data is from colony 2 and the frame rate is accelerated 5  
676 times. The green line shows the worker's trajectory in the previous minute.

677

678 **Supplementary Video 2. Targeted queen recruitment to the tunnel.** Worker 632 (in  
679 pink) approaches the queen, pulls on her mandibles, and then returns to the tunnel with  
680 the queen (in blue) following her. The data are from colony 1.

681

682 **Supplementary Video 3. Recruitment of two non-transporters to the tunnel.** Worker  
683 458 (in green) interacts with workers 607 (in blue) and 278 (in cream), and both then follow  
684 worker 458 to the tunnel. The trajectories are shown for all three workers after the  
685 interactions finished. The data are from colony 1.
